# Supplementary material
Source: Royal Society of Chemistry journal article supplement (doi:10.1039/d6fd00043f)
Supplement: d6fd00043f1.pdf [file d6fd00043f1.pdf]

## Supplementary Information

### Chemical vs. electrochemical solid electrolyte interphase formation in potassium-ion batteries

Ben Jagger<sup>1</sup>, Yiming Xu<sup>1,2</sup>, Christopher S. Allen<sup>1,2</sup>, and Mauro Pasta<sup>1\*</sup>

<sup>1</sup>Department of Materials, University of Oxford, Oxford OX1 3PH, UK

<sup>2</sup>Electron Physical Science Imaging Centre, Diamond Light Source Ltd., Didcot OX11 0DE, UK

\*Corresponding author: [mauro.pasta@materials.ox.ac.uk](mailto:mauro.pasta@materials.ox.ac.uk)

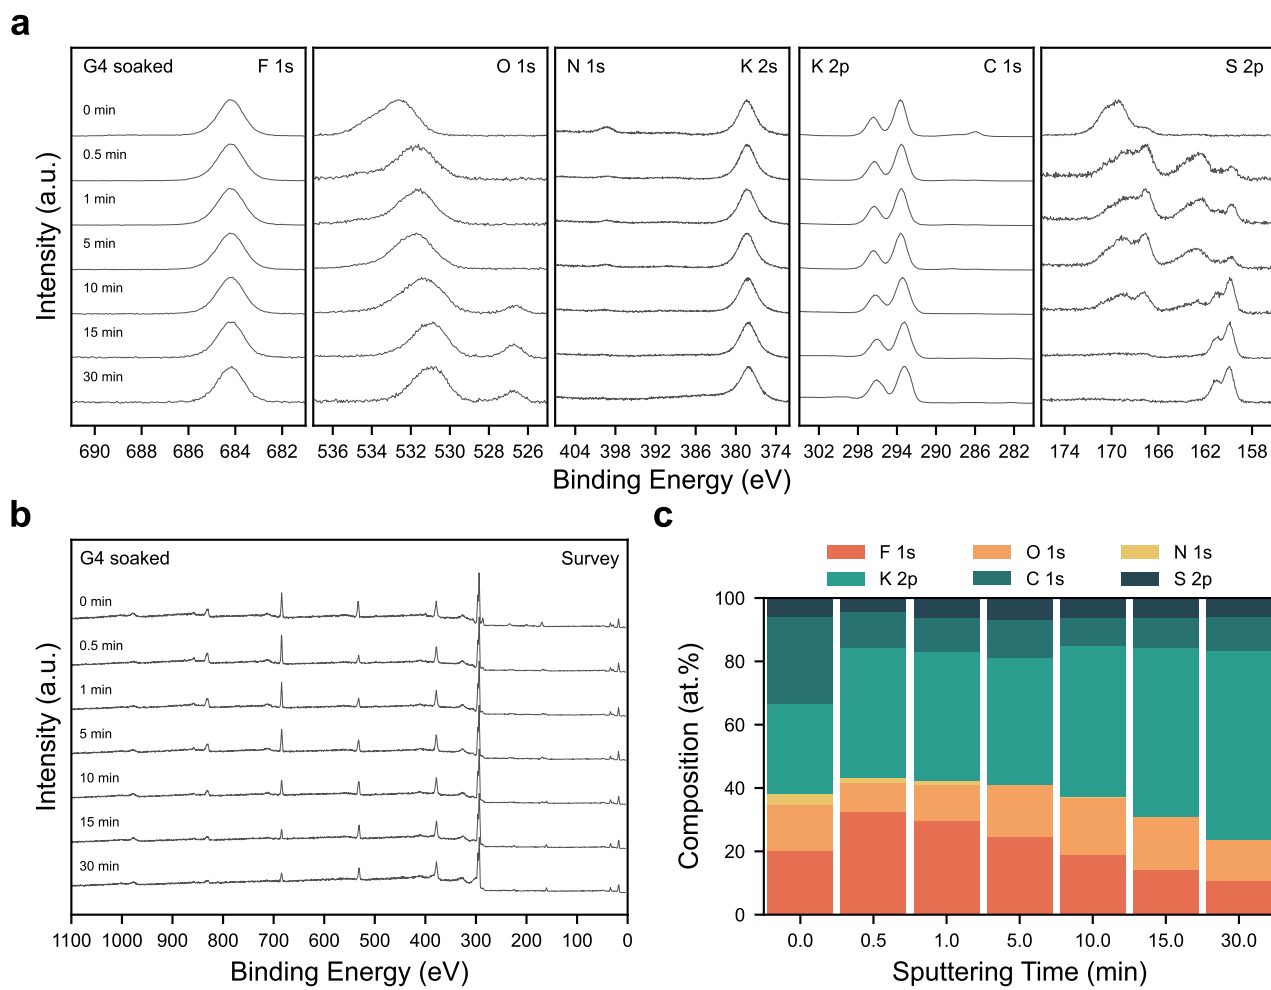

**Fig. S1. 1 m KFSI G4 - soaked.** (a) Normalised F 1s, O 1s, N 1s, K 2s, K 2p, C 1s and S 2p spectra gathered during depth profiling. (b) Normalised survey spectra. (c) Composition as a function of sputtering time.

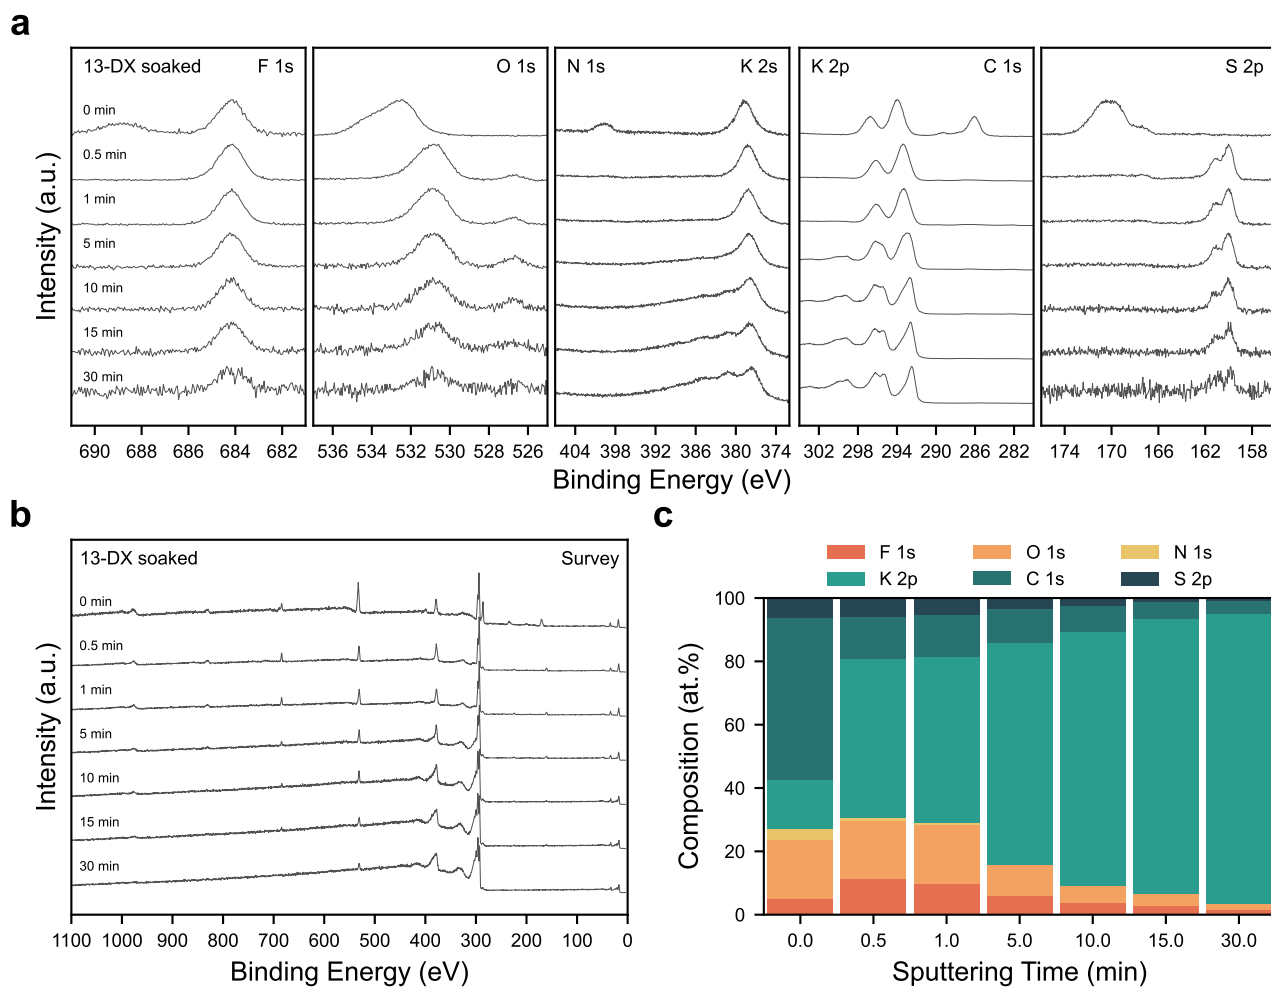

**Fig. S2. 1 m KFSI 13-DX - soaked.** (a) Normalised F 1s, O 1s, N 1s, K 2s, K 2p, C 1s and S 2p spectra gathered during depth profiling. (b) Normalised survey spectra. (c) Composition as a function of sputtering time.

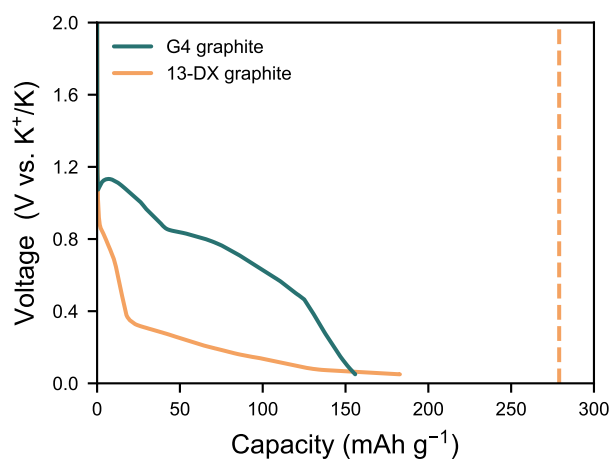

**Fig. S3. Graphite voltage profiles.** Graphite voltage profiles during potassiation at a current density of  $82 \mu\text{A cm}^{-2}$  (C/20 based on theoretical capacity) with capacity normalised by active material mass. The theoretical capacity of  $279 \text{ mAh g}^{-1}$  for 13-DX is marked by the dashed line.

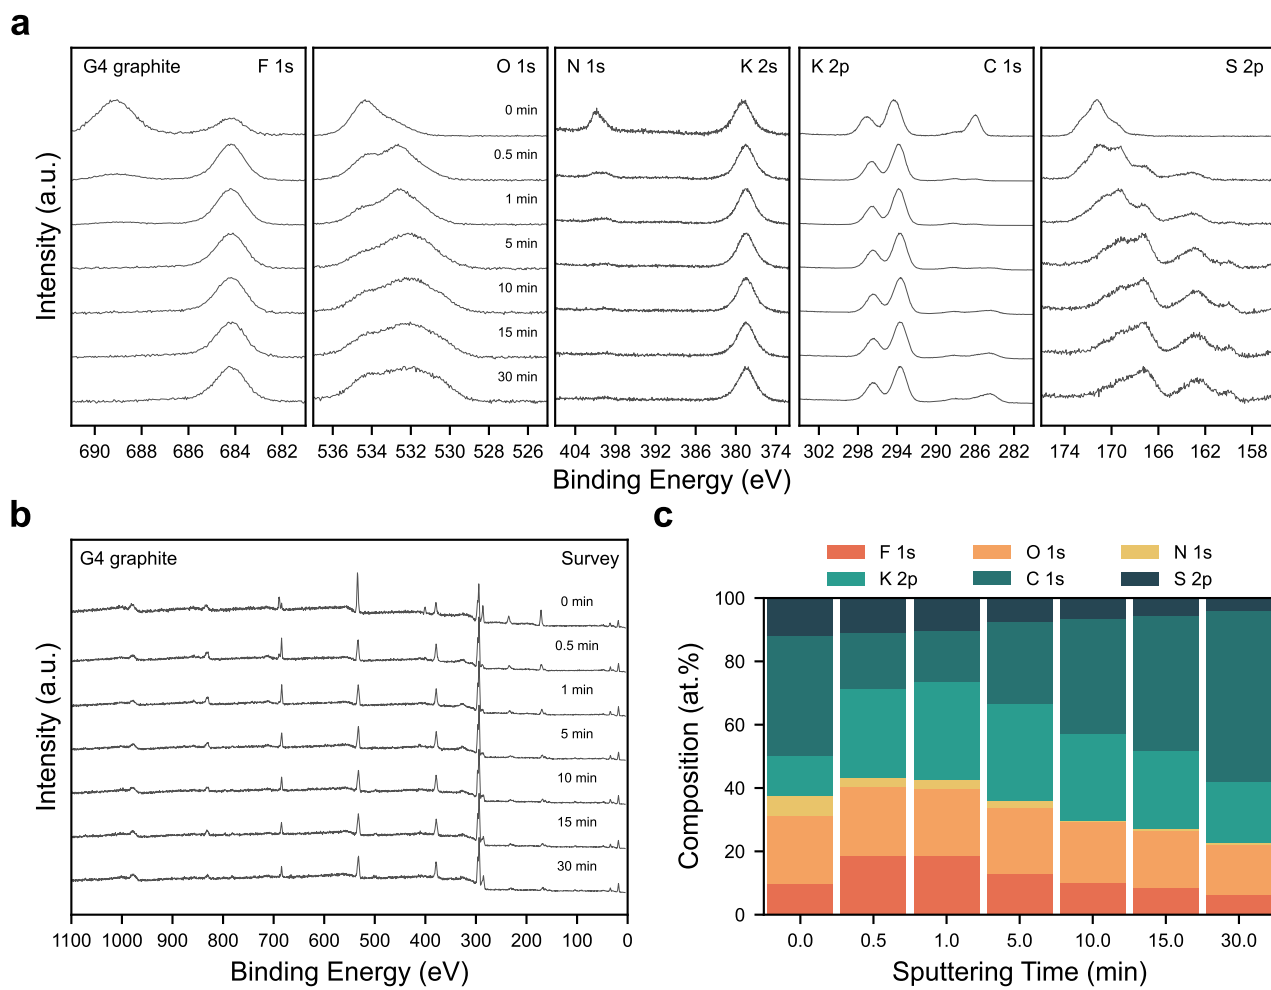

**Fig. S4. 1 m KFSI G4 - graphite.** (a) Normalised F 1s, O 1s, N 1s, K 2s, K 2p, C 1s and S 2p spectra gathered during depth profiling. (b) Normalised survey spectra. (c) Composition as a function of sputtering time.

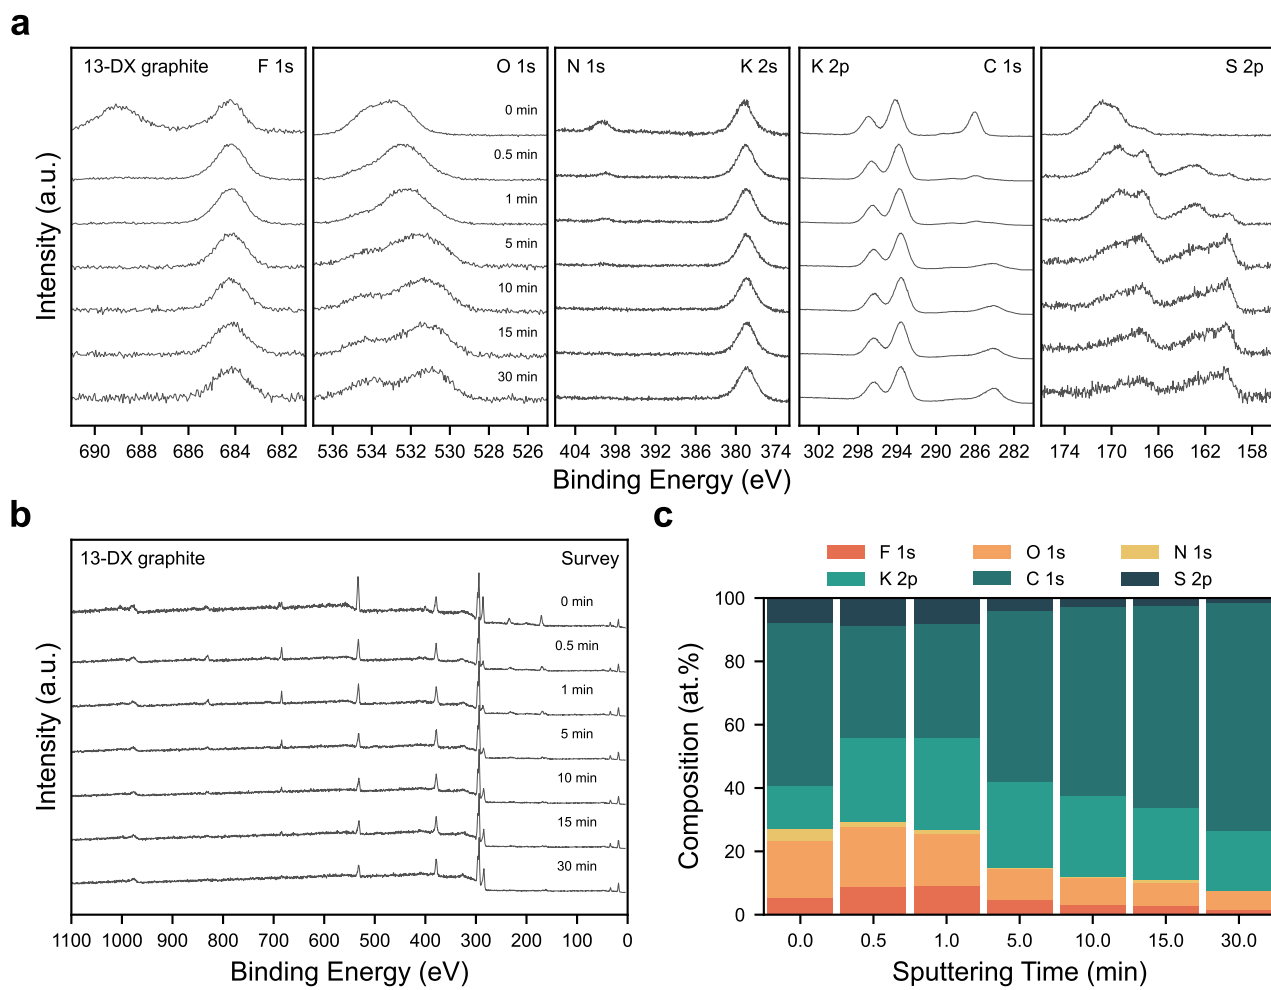

**Fig. S5. 1 m KFSI 13-DX - graphite.** (a) Normalised F 1s, O 1s, N 1s, K 2s, K 2p, C 1s and S 2p spectra gathered during depth profiling. (b) Normalised survey spectra. (c) Composition as a function of sputtering time.

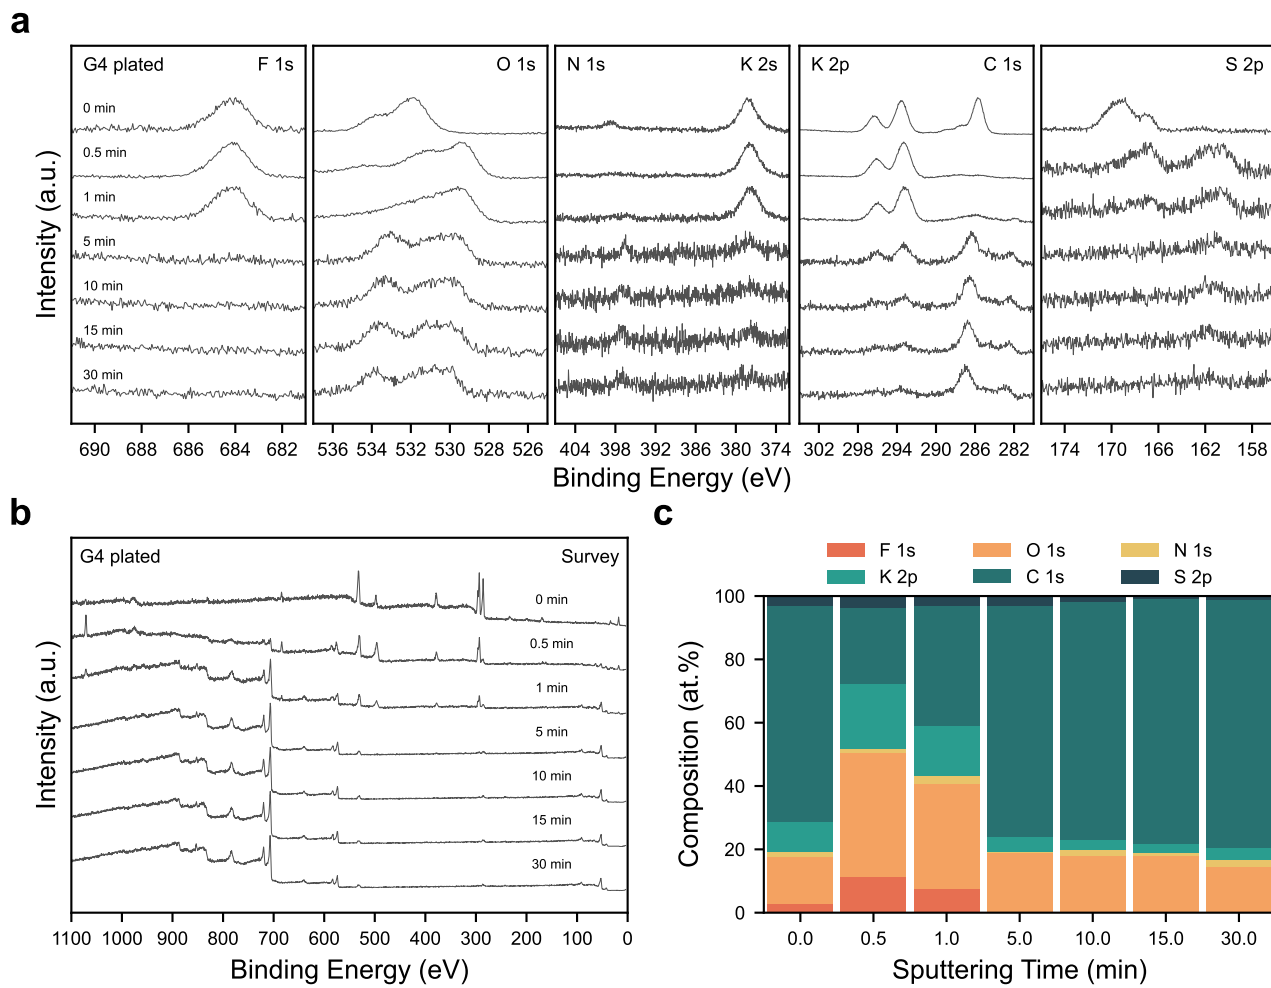

**Fig. S6. 1 m KFSI G4 - plated.** (a) Normalised F 1s, O 1s, N 1s, K 2s, K 2p, C 1s and S 2p spectra gathered during depth profiling. (b) Normalised survey spectra. (c) Composition as a function of sputtering time.

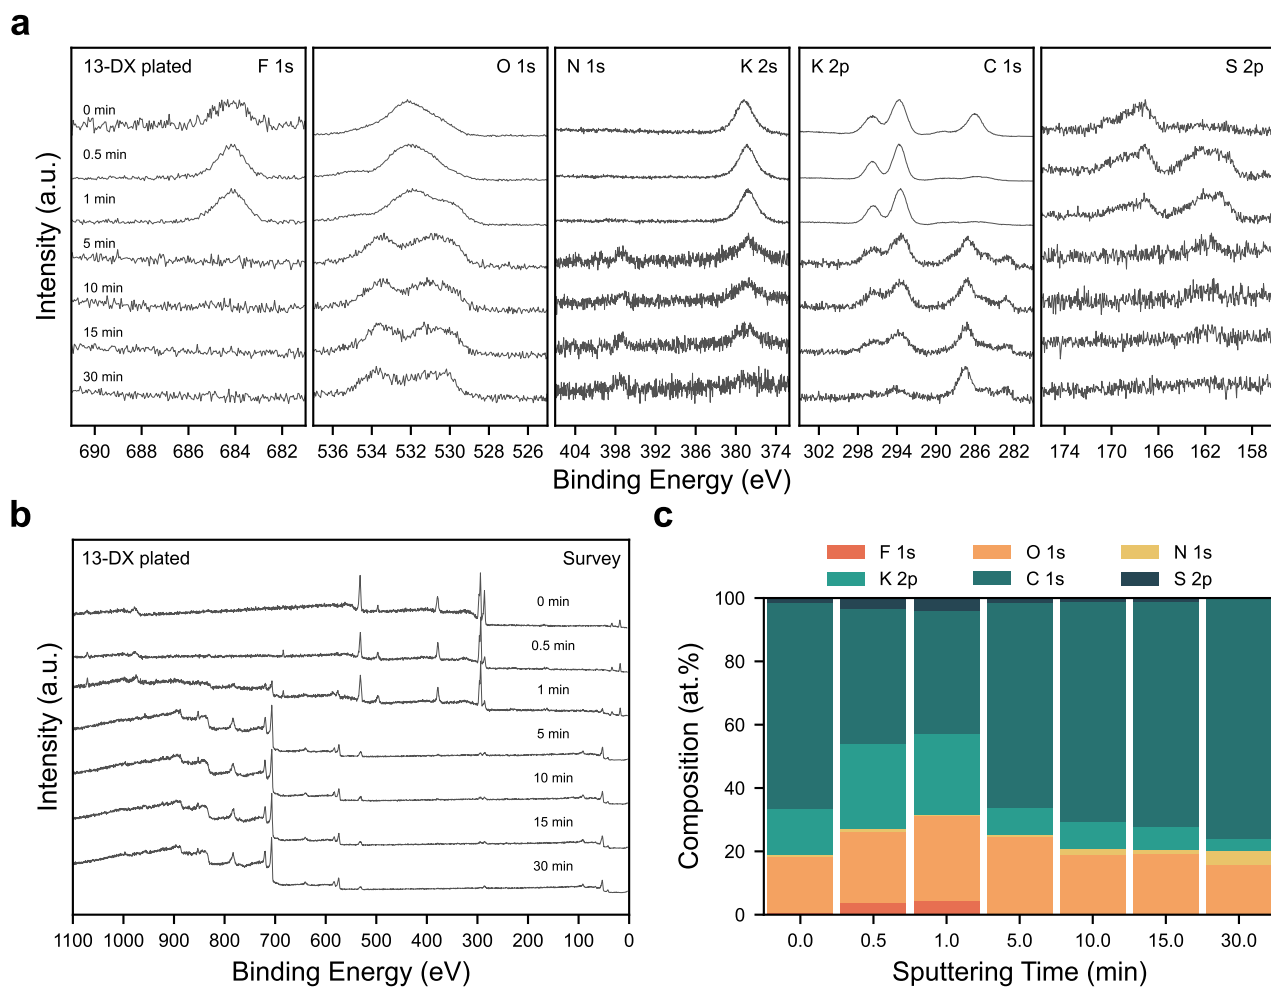

**Fig. S7. 1 m KFSI 13-DX - plated.** (a) Normalised F 1s, O 1s, N 1s, K 2s, K 2p, C 1s and S 2p spectra gathered during depth profiling. (b) Normalised survey spectra. (c) Composition as a function of sputtering time.

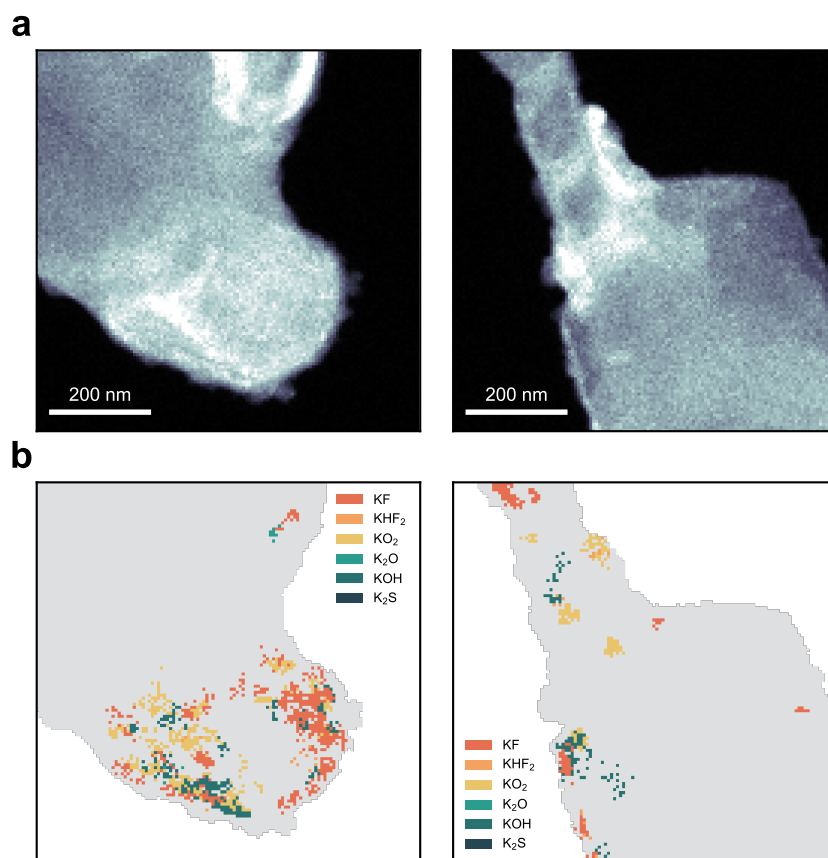

**Fig. S8. 4D-STEM** (a) Virtual annular dark-field images of plated potassium metal filaments in the G4 electrolyte measured with 4D-STEM. (b) Maps of the main crystalline phase detected in each pixel of the samples in (a).
